# Supplementary material for: A NiCo2S4 octahedral configuration doped by Mn, Zn and Cu for the oxygen evolution reaction
Source: Royal Society of Chemistry journal article supplement (doi:10.1039/d3cc06171j), 2024-01-01
Supplement: d3cc06171j1.pdf [file d3cc06171j1.pdf]

## *Supporting information*

### **NiCo<sub>2</sub>S<sub>4</sub> octahedral configuration doped by Mn, Zn and Cu for oxygen evolution reaction**

Yiting Chen<sup>a,b</sup>, Hongyan Wu<sup>a,c</sup>, Ning Tang<sup>c</sup>, Yong Zhang<sup>c,\*</sup> and Yuqiao Wang<sup>a,b,\*</sup>

<sup>a</sup> Research Center for Nano Photoelectrochemistry and Devices, School of Chemistry and Chemical Engineering, Southeast University, Nanjing 211189, China

<sup>b</sup> Yangtze River Delta Carbon Neutrality Strategy Development Institute, Southeast University, Nanjing 210096, China

<sup>c</sup> College of Textile Science and Engineering (International Silk College), Zhejiang Sci-Tech University, Hangzhou 310018, China

\* Corresponding author. Tel: +86 25 52090619; Fax: +86 25 52090621

E-mail address: zhangyong@zstu.edu.cn (Y. Zhang), yqwang@seu.edu.cn (Y. Wang).

## **Experimental Section**

### **Chemicals**

All chemical reagents were analytical grade and used directly without further purification. A piece of nickel foam (NF, 4 cm × 3 cm) was pretreated by 3 M HCl under sonication and washed by deionized water and alcohol three times, respectively.

### **Materials Synthesis**

#### **Synthesis of M-NiCo (M = Mn, Cu, Zn) precursor**

Typically, 0.48 g NiCl<sub>2</sub>·6H<sub>2</sub>O, 0.95 g CoCl<sub>2</sub>·6H<sub>2</sub>O, 1.6 g hexamethylenetetramine, and 0.019 g MnCl<sub>2</sub> (0.026 g CuCl<sub>2</sub>·2H<sub>2</sub>O or 0.021 g ZnCl<sub>2</sub>) were added into 60 mL of deionized water under stirring for 30 min to form a transparent solution. The mole ratio of the doped element to the main elements is about 1:40. Then, the mixture was transferred into a 100 mL Teflon-lined stainless-steel autoclave with the clean NF at 100 °C for 8 h. The M-NiCo (M = Mn, Cu, Zn) precursor was gained after being washed with absolute ethanol three times to remove impurities and dried at 60 °C overnight in a vacuum.

#### **Synthesis of M-NiCo<sub>2</sub>S<sub>4</sub> (M = Mn, Cu, Zn) nanosheets**

The homogeneous solution was prepared with 0.96 g Na<sub>2</sub>S·9H<sub>2</sub>O dissolved in 60 mL of deionized water under stirring for 30 min to form a transparent solution. The solution was transferred into a 100 mL Teflon autoclave with an as-prepared M-NiCo (M = Mn, Cu, Zn) precursor and maintained at 160 °C for 5 h. M-NiCo<sub>2</sub>S<sub>4</sub> (M = Mn, Cu, Zn) was obtained after being washed with absolute ethanol three times to remove impurities and dried at 60 °C overnight in a vacuum.

For comparison, NiCo<sub>2</sub>S<sub>4</sub> was synthesized by the same method. The loading masses of NiCo<sub>2</sub>S<sub>4</sub>, Mn-NiCo<sub>2</sub>S<sub>4</sub>, Cu-NiCo<sub>2</sub>S<sub>4</sub> and Zn-NiCo<sub>2</sub>S<sub>4</sub> were of 1.26, 3.17, 2.00 and 1.49 mg cm<sup>-2</sup>, respectively.

### **Materials Characterizations**

The morphologies and structures were characterized by scanning electron microscope (SEM,

FEI Inspect F50), transmission electron microscope (TEM) and high-resolution TEM (HRTEM, FEI TECNAI G2 20) with the energy dispersive spectrometer mapping analysis. The crystal structure was analyzed by X-ray diffraction (XRD, Ultima IV). The X-ray photoelectron spectroscopy (XPS, AXIS Ultra) was used to detect surface bonding.

## Electrochemical Measurements

All electrochemical measurements were carried out on the electrochemical workstation (CHI 760E) in 1.0 M KOH. The OER performance was recorded using a three-electron system with a graphite rod as a counter electrode and a standard calomel electrode (SCE) as a reference electrode.

Linear sweep voltammetry (LSV) curves were collected at a scan rate of 2 mV s<sup>-1</sup> with 90% iR compensation. We applied the negative scanning direction to avoid the influence of oxidation peak on overpotential in the LSV measurement. Tafel slopes were obtained from the curves of the overpotential versus the logarithm of current density according to LSV curves. All potentials were converted to a reversible hydrogen electrode (RHE) using the equation:  $E_{\text{RHE}} = E_{\text{SCE}} + 0.241 \text{ V} + 0.059 \times \text{pH}$ . The  $C_{\text{dl}}$  values were evaluated based on cyclic voltammetry (CV) curves under non-Faradaic region. Electrochemical active surface area (ECSA) was calculated as following equation:  $\text{ECSA} = C_{\text{dl}} / C_s$ ,  $C_s$  means a general specific capacitance (0.04 mF cm<sup>-2</sup>). Electrochemical impedance spectroscopy (EIS) was monitored with an amplitude of 5 mV and the frequency range from 10 kHz to 0.01 Hz. The multcurrent processes and chronopotentiometry curve were investigated without iR compensation.

For comparison, the RuO<sub>2</sub> and Ni foam were evaluated. The working electrodes of RuO<sub>2</sub> was prepared by dispersing 2 mg powders into a water-ethanol solution containing 10 μL Nafion and sonicating for 1 h to form a homogeneous catalyst ink. Then the catalyst ink was cast onto Ni foam and dried in air at room temperature.

Mn-NiCo<sub>2</sub>S<sub>4</sub> as anode and the commercial Pt/C as cathode, the water splitting performance was tested. The preparation of Pt/C electrode is similar to that of RuO<sub>2</sub>. Linear sweep voltammetry (LSV) curves were collected at a scan rate of 2 mV s<sup>-1</sup> and stability tests were performed at the current density of 10 mA cm<sup>-2</sup>. As a comparison, the water splitting performance of RuO<sub>2</sub> as anode and Pt/C as cathode was also evaluated.

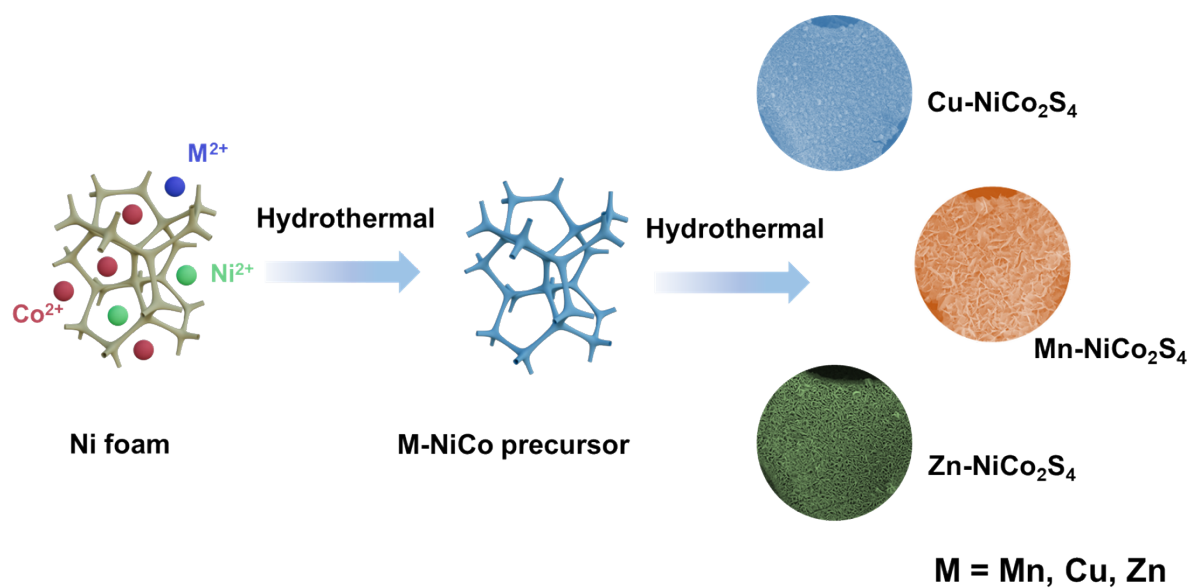

**Fig. S1.** Schematic illustration for the synthesis of  $\text{M-NiCo}_2\text{S}_4$  ( $\text{M} = \text{Mn, Cu, Zn}$ ).

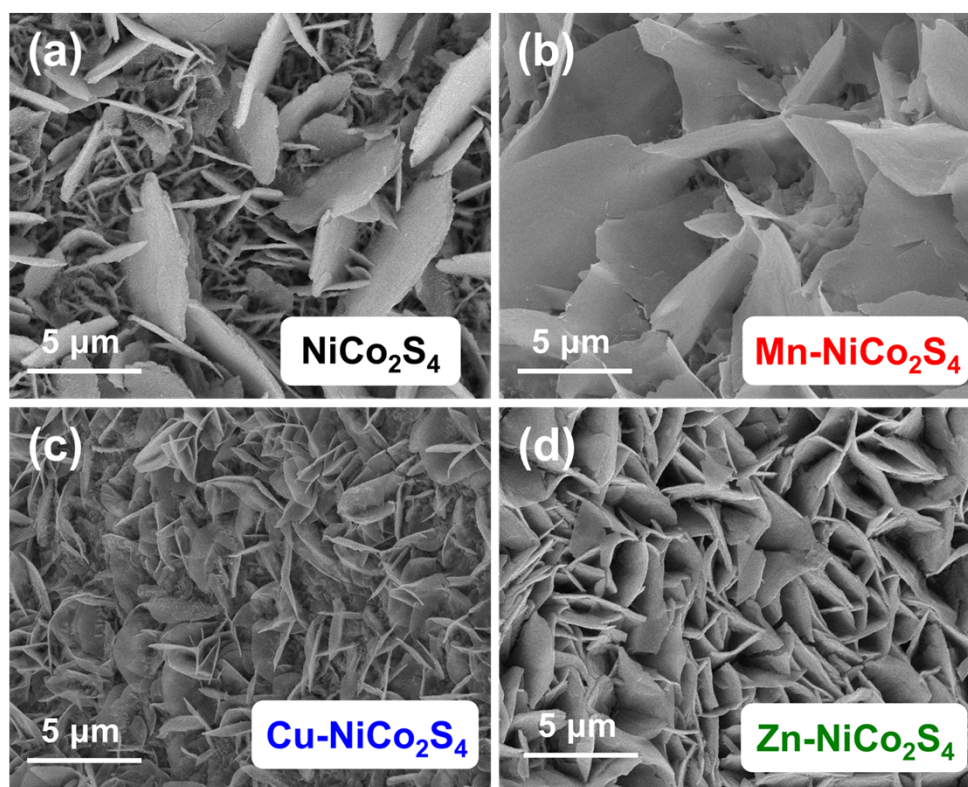

**Fig. S2.** SEM images of (a)  $\text{NiCo}_2\text{S}_4$ , (b)  $\text{Mn-NiCo}_2\text{S}_4$ , (c)  $\text{Cu-NiCo}_2\text{S}_4$ , (d)  $\text{Zn-NiCo}_2\text{S}_4$ .

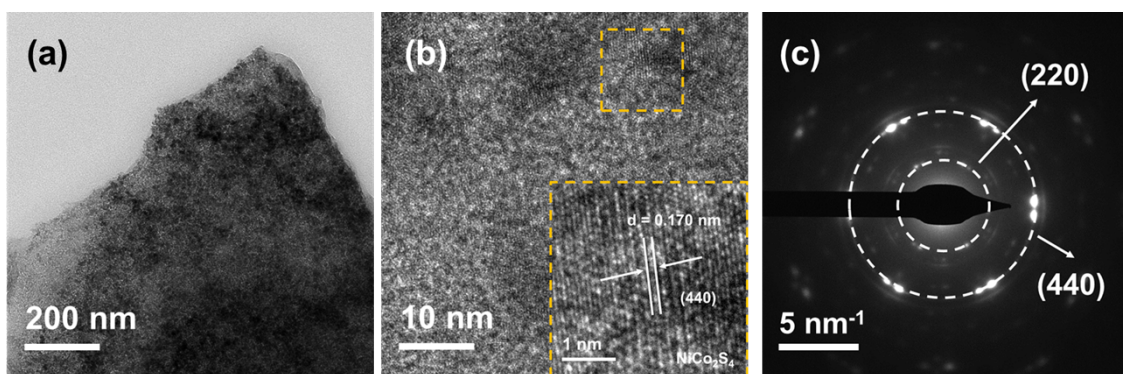

**Fig. S3.** (a) TEM, (b) HRTEM image and (c) Electron diffraction pattern of  $\text{NiCo}_2\text{S}_4$ .

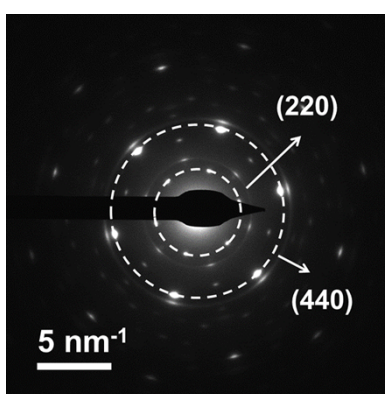

**Fig. S4.** Electron diffraction pattern of  $\text{Mn-NiCo}_2\text{S}_4$ .

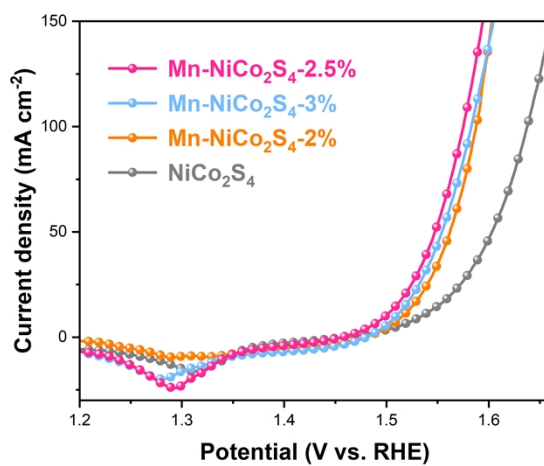

**Fig. S5.** LSV curves of  $\text{Mn-NiCo}_2\text{S}_4$  with different doping amount.

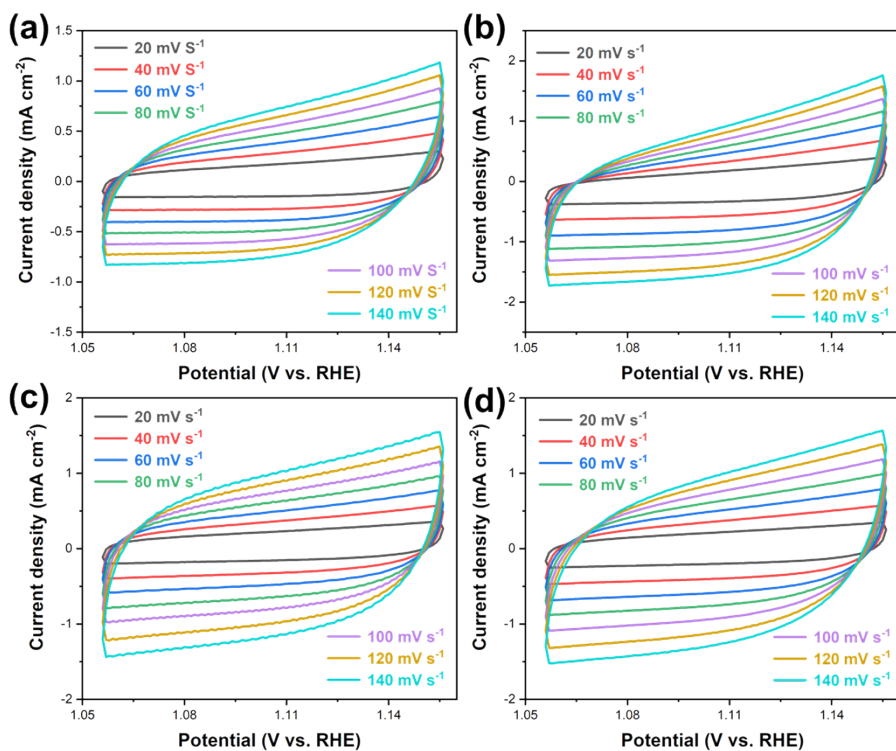

**Fig. S6.** CV curves of (a) NiCo<sub>2</sub>S<sub>4</sub>, (b) Mn-NiCo<sub>2</sub>S<sub>4</sub>, (c) Cu-NiCo<sub>2</sub>S<sub>4</sub>, (d) Zn-NiCo<sub>2</sub>S<sub>4</sub>.

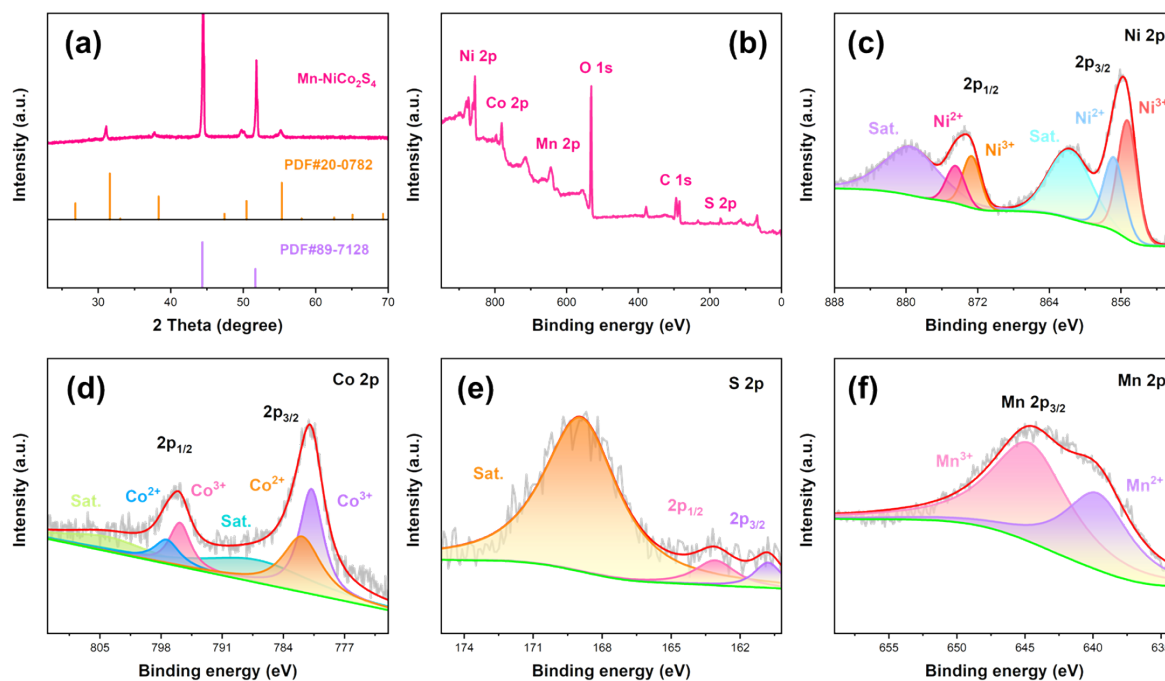

**Fig. S7.** (a) XRD and (b-f) XPS patterns of Mn-NiCo<sub>2</sub>S<sub>4</sub> after chronoamperometric (i-t) curves.

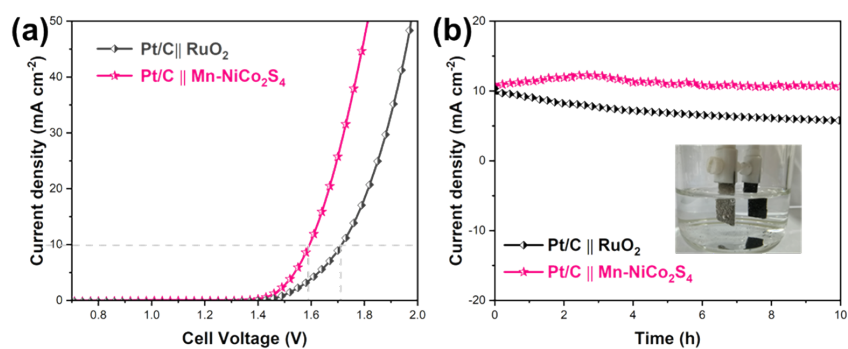

**Figure S8.** (a) Linear sweep voltammetry (LSV) curves and (b) Chronoamperometric (i-t) curves of Pt/C||RuO<sub>2</sub> and Pt/C||Mn-NiCo<sub>2</sub>S<sub>4</sub> electrodes (inset: bubble image of Pt/C||Mn-NiCo<sub>2</sub>S<sub>4</sub> electrodes).

**Table S1.** Atomic ratio (%) of doping elements in M-NiCo<sub>2</sub>S<sub>4</sub> by XPS analysis

| Elements | M-NiCo <sub>2</sub> S <sub>4</sub> (M = Mn, Cu, Zn) |
|----------|-----------------------------------------------------|
| Mn       | 3.68                                                |
| Cu       | 3.26                                                |
| Zn       | 3.30                                                |

**Table S2.** The corresponding EIS parameters of the as-prepared NiCo<sub>2</sub>S<sub>4</sub>, Zn-NiCo<sub>2</sub>S<sub>4</sub>, Mn-NiCo<sub>2</sub>S<sub>4</sub> and Cu-NiCo<sub>2</sub>S<sub>4</sub> catalysts.

|                      | NiCo <sub>2</sub> S <sub>4</sub> | Zn-NiCo <sub>2</sub> S <sub>4</sub> | Mn-NiCo <sub>2</sub> S <sub>4</sub> | Cu-NiCo <sub>2</sub> S <sub>4</sub> |
|----------------------|----------------------------------|-------------------------------------|-------------------------------------|-------------------------------------|
| R <sub>s</sub> (ohm) | 2.45                             | 2.31                                | 1.70                                | 2.27                                |
| R <sub>1</sub> (ohm) | 4.51                             | 2.15                                | 0.51                                | 0.76                                |
| R <sub>2</sub> (ohm) | 6.60                             | 3.93                                | 3.21                                | 3.52                                |
| CPE1-T               | 2.30                             | 0.41                                | 0.87                                | 0.61                                |
| CPE1-P               | 0.64                             | 0.73                                | 0.56                                | 0.71                                |
| CPE2-T               | 2.07                             | 0.54                                | 1.11                                | 0.52                                |
| CPE2-P               | 0.92                             | 0.97                                | 0.86                                | 0.93                                |



**Table S3.** Comparison of OER performance between the catalyst prepared in this work with other electrocatalysts in 1 M KOH.

| Catalysts                                   | OER performance    |                                     | References |
|---------------------------------------------|--------------------|-------------------------------------|------------|
|                                             | Overpotential (mV) | Tafel slope (mV dec <sup>-1</sup> ) |            |
| Mn-NiCo <sub>2</sub> S <sub>4</sub>         | 269                | 55.4                                | This work  |
| NiCo <sub>2</sub> S <sub>4</sub> @NiCoNC/CC | 280                | 81.8                                | [1]        |
| Ni/Co <sub>9</sub> S <sub>8</sub> @CNT      | 289                | 69.0                                | [2]        |
| Co <sub>9</sub> S <sub>8</sub> -ZnS/NTC     | 290                | 69.0                                | [3]        |
| CoS-Ag                                      | 293                | 55.3                                | [4]        |
| Fe-Co <sub>9</sub> S <sub>8</sub> @CoO      | 296                | 65.0                                | [5]        |
| MoS <sub>2</sub> /NiPS <sub>3</sub>         | 296                | 86.0                                | [6]        |
| Ni <sub>3</sub> S <sub>2</sub> -QDs/SNC     | 310                | 73.0                                | [7]        |
| Ni-1T-MoS <sub>2</sub>                      | 310                | 103.2                               | [8]        |
| FeCo-3/NSC                                  | 312                | 96.4                                | [9]        |
| MnCo <sub>2</sub> S <sub>4</sub>            | 317                | 73.7                                | [10]       |
| Ni(OH) <sub>2</sub> /MoS <sub>2</sub> NFs   | 328                | 69.3                                | [11]       |
| Co/Co <sub>9</sub> S <sub>8</sub> /MnS-NMC  | 330                | 55.1                                | [12]       |
| Mn-CoN <sub>x</sub> /N-PC                   | 330                | 136.0                               | [13]       |
| Co <sub>9</sub> S <sub>8</sub> /MnS-USNC    | 360                | 137.0                               | [14]       |
| NiCo <sub>2</sub> S <sub>4</sub> /RGO       | 366                | 65.0                                | [15]       |

**Table S4.** Comparison of water splitting performance between the catalyst prepared in this work with other electrocatalysts in 1 M KOH.

| anode                                   | cathode                                | cell voltage(V) for OWS | References |
|-----------------------------------------|----------------------------------------|-------------------------|------------|
| Mn-NiCo <sub>2</sub> S <sub>4</sub> /NF | Pt/C                                   | 1.59                    | This work  |
| MnCo <sub>2</sub> S <sub>4</sub> /NF    | MnCo <sub>2</sub> S <sub>4</sub> /NF   | 1.61                    | [16]       |
| NiS/NF                                  | NiS/NF                                 | 1.64                    | [17]       |
| NiCo <sub>2</sub> S <sub>4</sub> NA/CC  | NiCo <sub>2</sub> S <sub>4</sub> NA/CC | 1.68                    | [18]       |
| a-NiO                                   | a-NiO                                  | 1.70                    | [19]       |
| Fe, S-CoP                               | Pt/C                                   | 1.59                    | [20]       |
| CoO@Cu <sub>2</sub> S                   | Pt/C                                   | 1.60                    | [21]       |
| NiFeP/MXene                             | Pt/C                                   | 1.61                    | [22]       |

## References

- 1 Z. Wang, L. Yang, S. Liu, H. Yu, X. Li, Y. Xu, L. Wang and H. Wang, *Nanotechnology*, 2020, **31**, 195402
- 2 X. Hu, W. Wang, B. Liang, D. Sun, Y. Gao, W. Liao, Q. Yang, G. Li and X. Zuo, *Catal. Lett.*, 2021, **152**, 1321-1330
- 3 Y. Yang, D. Wang, Y. Wang, Z. Li, R. Su, X. Wang, T. Xu and S. Wang, *ACS Appl. Energy Mater.*, 2022, **5**, 14869-14880
- 4 S. Cheng, R. Zhang, W. Zhu, W. Ke and E. Li, *Appl. Surf. Sci.*, 2020, **518**, 146106
- 5 T. Wang, C. Li, X. Liao, Q. Li, W. Hu, Y. Chen, W. Yuan and H. Lin, *Int. J. Hydrogen. Energy.*, 2022, **47**, 21182-21190
- 6 Y. Liu, Y. Chen, Y. Tian, T. Sakthivel, H. Liu, S. Guo, H. Zeng and Z. Dai, *Adv. Mater.*, 2022, **34**, 2203615
- 7 F. Xu, J. Wang, Y. Zhang, W. Wang, T. Guan, N. Wang and K. Li, *Chem. Eng. J.*, 2022, **432**, 134256
- 8 G. Wang, G. Zhang, X. Ke, X. Chen, X. Chen, Y. Wang, G. Huang, J. Dong, S. Chu and M. Sui, *Small*, 2022, **18**, 2107238
- 9 S. Chang, H. Zhang and Z. Zhang, *J. Energy Chem.*, 2021, **56**, 64-71
- 10 Z. Dai, X. Feng, Q. Li, P. Su, X. Shen, Y. Zheng, Q. Jiao, Y. Zhao, H. Li and C. Feng, *J. Alloy Compd.*, 2021, **872**, 159652
- 11 K. T. Le, N. N. T. Pham, Y. S. Liao, A. Ranjan, H. Y. Lin, P. H. Chen, H. Nguyen, M. Y. Lu, S. G. Lee and J. M. Wu, *J. Mater. Chem. A*, 2023, **11**, 3481-3492
- 12 K. Chen, X. Wang, C. Zhang, R. Xu, H. Wang, L. Chu, M. Huang, *Mater Today Energy*, 2022,

30, 101150

- 13 H. Zheng, F. Ma, H. Yang, X. Wu, R. Wang, D. Jia, Z. Wang, N. Lu, S. Peng and F. Ran, *Nano Research*, 2022, **15**, 1942-1948
- 14 J. Li, W. Li, H. Mi, Y. Li, L. Deng, Q. Zhang, C. He and X. Ren, *J. Mater. Chem. A*, 2021, **9**, 22635-22642
- 15 C. Shuai, Z. Mo, X. Niu, X. Yang, G. Liu, J. Wang, N. Liu and R. Guo, *J. Mater. Sci.*, 2020, **55**, 1627-1636
- 16 B. Hou, J. Fu, H. Su and X. Du, *Chem. Select*, 2019, **4**, 4499-4505
- 17 W. Zhu, X. Yue, W. Zhang, S. Yu, Y. Zhang, J. Wang and J. Wang, *Chem. Commun.*, 2016, **52**, 1486-1489
- 18 D. Liu, Q. Lu, Y. Luo, X. Sun and A. M. Asiri, *Nanoscale*, 2015, **7**, 15122-15126
- 19 X. Zhang and X. Du, *New J. Chem.*, 2020, **44**, 1703-1706
- 20 L. Tian, X. Pang, H. Xu, D. Liu, X. Lu, J. Li, J. Wang and Z. Li, *Inorg. Chem.*, 2022, **61**, 16944-16951
- 21 Y. Li, X. Zhang, S. Zhuo, S. Liu, A. Han, L. Li and Y. Tian, *Appl. Surf. Sci.*, 2021, **555**, 149441
- 22 J. Chen, Q. Long, K. Xiao, T. Ouyang, N. Li, S. Ye and Z.-Q. Liu, *Sci. Bull.*, 2021, **66**, 1063-1072
